## Epidemiology Note

# Cancer Incidence and Incidence Rates in Japan in 1999: Estimates Based on Data from 11 Population-based Cancer Registries

The Research Group for Population-based Cancer Registration in Japan\*

Received March 21, 2004; accepted March 25, 2004

*Key words: cancer incidence – incidence estimates – cancer registry – Japan*

The Research Group for Population-based Cancer Registration in Japan estimated the cancer incidence in Japan in 1999 on the basis of data collected from 11 population-based cancer registries: Miyagi, Yamagata, Chiba, Kanagawa, Niigata, Fukui, Aichi, Shiga, Osaka, Hiroshima City and Nagasaki. The methods of estimation and their limitations have been explained in previous papers (1–3). The number of incidences, crude rates, age-standardized rates and completeness of registration in 1999 are shown in Table 1, and the age-specific number of incidences and crude rates according to sex and primary site are shown in Tables 2 and 3. The number of incidence for 1999 was estimated as 530 000. The time trends of age-standardized incidence rates for the major sites in 1975–99 standardized to the world population are shown in Fig. 1 and those standardized to the 1985 Japanese model population are shown in Fig. 2. The leading site according to the age-standardized incidence rate was stomach for males and breast for females, as shown in Figures 1 and 2.

The estimated cancer incidence data in Japan by sex, site, 5-year age group and calendar year during the period of 1975–99 are available on a Website (<http://www.mc.pref.osaka.jp/ocr/>) or by correspondence with the principal investigator of the Research Group (Dr H. Tsukuma).

## Acknowledgments

In 2003, the Research Group conducted the 30th survey on cancer incidence and cancer medical care with the cooperation of the Aichi Cancer Center (Dr T. Kuroishi) and the contribu-

tion from 13 cancer registries: Miyagi (Dr D. Shibuya), Yamagata (Dr T. Matsuda), Chiba (Dr H. Mikami), Kanagawa (Dr A. Miyamatsu), Niigata (Dr K. Ogoshi), Fukui (Dr M. Fujita), Aichi (Dr K. Tajima), Shiga (Dr T. Uehata), Osaka (Dr H. Tsukuma), Tottori (Dr T. Kishimoto), Hiroshima City (Dr K. Koyama), Nagasaki (Dr M. Soda) and Okinawa (Dr S. Shimoji). The study was supported by a Grant-in-Aid for Cancer Research from the Japanese Ministry of Health, Labor and Welfare: (14–2).

## References

1. The Research Group for Population-based Cancer Registration in Japan. Cancer incidence and incidence rates in Japan in 1988: estimates based on data from ten population-based cancer registries. *Jpn J Clin Oncol* 1994; 24:299–304.
2. The Research Group for Population-based Cancer Registration in Japan. Cancer incidence in Japan, 1985–89: re-estimation based on data from eight population-based cancer registries. *Jpn J Clin Oncol* 1999;28:54–67.
3. The Research Group for Population-based Cancer Registration in Japan. Cancer incidence in Japan. In: Tajima K, Kuroishi T and Oshima A, editors. Cancer Mortality and Morbidity Statistics – Japan and the World – 2004. Gann Monograph on Cancer Research No. 51. Tokyo: Japanese Scientific Societies Press 2004;95–130.

\*This report was prepared by Wakiko Ajiki, Hideaki Tsukuma and Akira Oshima, Department of Cancer Control and Statistics, Osaka Medical Center for Cancer and Cardiovascular Diseases, Osaka, Japan

For reprints and all correspondence: Wakiko Ajiki, Department of Cancer Control and Statistics, Osaka Medical Center for Cancer and Cardiovascular Diseases, Nakamichi 1–3–3, Higashinari-ku, Osaka 537-8511, Japan.  
E-mail: [ajiki-mi@umin.ac.jp](mailto:ajiki-mi@umin.ac.jp)

Abbreviations: ICD-10th, International Classification of Diseases, 10th Revision; DCO/I, proportion of cases with the death certificate only to incident cases; I/D, number of incidence/number of deaths; HV/I, proportion of histologically verified cases to incident cases; CIS/carcinoma *in situ*

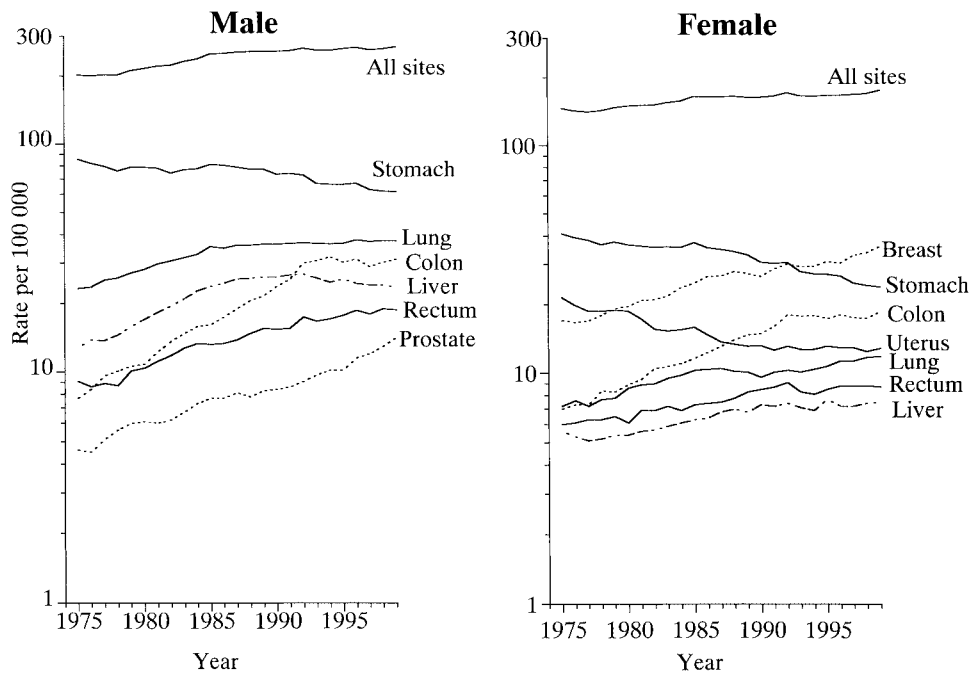

Figure 1. Trends of age-standardized cancer incidence rates for major sites (standard population: world population).

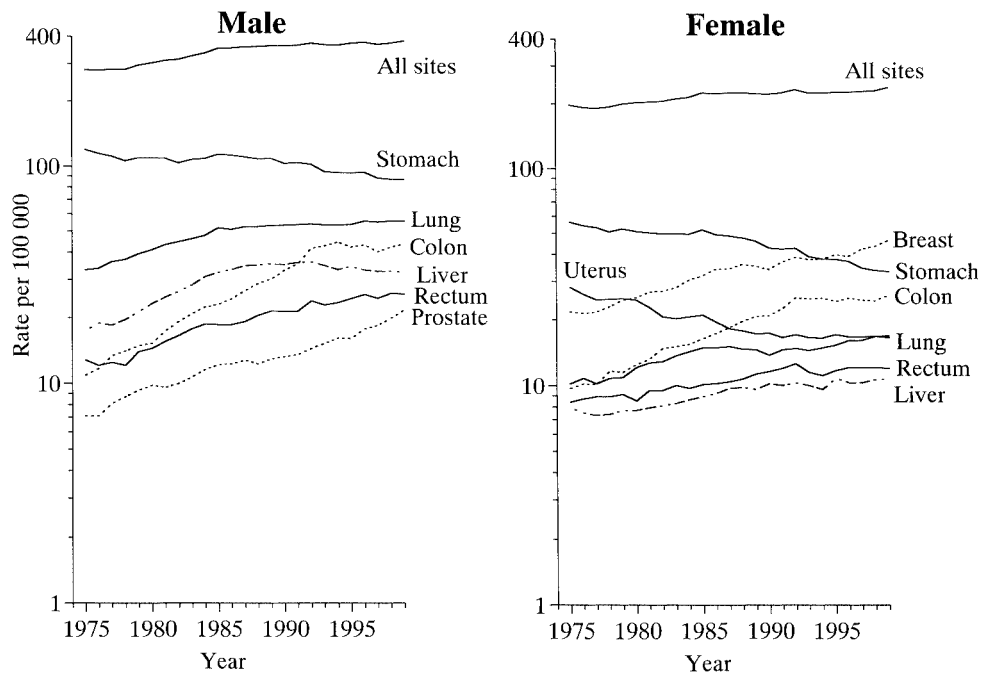

Figure 2. Trends of age-standardized cancer incidence rates for major sites (standard population: 1985 Japanese model population).

**Table 1.** Incidence, completeness of reporting and accuracy of diagnosis in Japan according to sex and primary site, 1999

| Sex                      | Primary sites                | ICD-10th        | No. of incidence | Crude rate* | Age-standardized rate* |                                | Completeness of reporting |      | Accuracy of diagnosis<br>HV/I (%) |
|--------------------------|------------------------------|-----------------|------------------|-------------|------------------------|--------------------------------|---------------------------|------|-----------------------------------|
|                          |                              |                 |                  |             | World population       | Japanese 1985 model population | DCO/I (%)                 | I/D  |                                   |
| Male                     | All sites                    | C00-C96         | 304 527          | 491.4       | 271.1                  | 381.7                          | 17.3                      | 1.73 | 71.4                              |
|                          | Lip, oral cavity and pharynx | C00-C14         | 6563             | 10.6        | 6.2                    | 8.4                            | 10.4                      | 1.88 | 83.2                              |
|                          | Esophagus                    | C15             | 12 402           | 20.0        | 11.0                   | 15.3                           | 14.2                      | 1.47 | 78.0                              |
|                          | Stomach                      | C16             | 69 627           | 112.4       | 61.8                   | 87.1                           | 13.6                      | 2.12 | 81.5                              |
|                          | Colon                        | C18             | 35 092           | 56.6        | 31.2                   | 43.8                           | 10.5                      | 2.96 | 83.3                              |
|                          | Rectum                       | C19-C21         | 20 461           | 33.0        | 18.7                   | 25.7                           | 9.4                       | 2.66 | 84.5                              |
|                          | Liver                        | C22             | 26 174           | 42.2        | 23.5                   | 32.4                           | 30.1                      | 1.11 | 28.6                              |
|                          | Gallbladder                  | C23-C24         | 8024             | 12.9        | 6.7                    | 9.9                            | 28.4                      | 1.19 | 45.0                              |
|                          | Pancreas                     | C25             | 10 490           | 16.9        | 9.0                    | 13.0                           | 32.2                      | 1.03 | 30.5                              |
|                          | Larynx                       | C32             | 3196             | 5.2         | 2.8                    | 4.0                            | 5.6                       | 3.52 | 88.1                              |
|                          | Lung                         | C33-C34         | 45 091           | 72.8        | 37.6                   | 55.7                           | 25.4                      | 1.19 | 65.7                              |
|                          | Skin                         | C43-C44         | 3834             | 6.2         | 3.4                    | 4.8                            | 5.3                       | 7.95 | 92.2                              |
|                          | Prostate                     | C61             | 17 865           | 28.8        | 14.1                   | 21.7                           | 13.6                      | 2.55 | 78.0                              |
|                          | Kidney                       | C64-C66 C68     | 6872             | 11.1        | 6.4                    | 8.8                            | 13.7                      | 2.22 | 74.5                              |
|                          | Bladder                      | C67             | 11 418           | 18.4        | 9.7                    | 14.2                           | 9.8                       | 3.46 | 84.0                              |
|                          | Brain and nervous system     | C70-C72         | 2222             | 3.6         | 2.7                    | 3.2                            | 23.3                      | 2.53 | 69.3                              |
|                          | Thyroid                      | C73             | 1520             | 2.5         | 1.6                    | 2.1                            | 7.0                       | 3.72 | 87.6                              |
|                          | Malignant lymphoma           | C81-C85 C96     | 7121             | 11.5        | 7.0                    | 9.3                            | 16.0                      | 1.58 | 80.7                              |
|                          | Multiple myeloma             | C88-C90         | 1812             | 2.9         | 1.5                    | 2.2                            | 32.5                      | 1.09 | 64.3                              |
|                          | Hematopoietic tissue         | C91-C95         | 4499             | 7.3         | 5.3                    | 6.2                            | 25.9                      | 1.16 | 71.4                              |
| Female                   | All sites (incl. CIS)        | C00-C96 D05-D06 | 224 996          | 347.7       | 176.0                  | 237.4                          | 17.1                      | 1.96 | 71.9                              |
|                          | All sites                    | C00-C96         | 219 163          | 338.7       | 168.6                  | 228.2                          | 17.5                      | 1.91 | 71.2                              |
|                          | Lip, oral cavity and pharynx | C00-C14         | 2638             | 4.1         | 2.0                    | 2.7                            | 11.7                      | 1.94 | 81.6                              |
|                          | Esophagus                    | C15             | 2428             | 3.8         | 1.6                    | 2.2                            | 22.0                      | 1.57 | 70.1                              |
|                          | Stomach                      | C16             | 34 058           | 52.6        | 23.8                   | 33.3                           | 17.5                      | 1.90 | 77.2                              |
|                          | Colon                        | C18             | 27 105           | 41.9        | 18.5                   | 25.9                           | 14.9                      | 2.38 | 78.0                              |
|                          | Rectum                       | C19-C21         | 11 834           | 18.3        | 8.7                    | 12.0                           | 11.4                      | 2.52 | 82.5                              |
|                          | Liver                        | C22             | 11 794           | 18.2        | 7.5                    | 10.7                           | 33.9                      | 1.14 | 25.1                              |
|                          | Gallbladder                  | C23-C24         | 9027             | 13.9        | 5.0                    | 7.5                            | 32.8                      | 1.11 | 35.8                              |
|                          | Pancreas                     | C25             | 8744             | 13.5        | 5.2                    | 7.6                            | 36.2                      | 1.03 | 25.5                              |
|                          | Larynx                       | C32             | 224              | 0.3         | 0.2                    | 0.2                            | 16.9                      | 2.60 | 80.0                              |
|                          | Lung                         | C33-C34         | 18 226           | 28.2        | 11.8                   | 16.9                           | 28.0                      | 1.28 | 62.0                              |
|                          | Skin                         | C43-C44         | 3490             | 5.4         | 2.2                    | 3.1                            | 6.6                       | 7.93 | 90.8                              |
|                          | Breast                       | C50 D05         | 36 139           | 55.8        | 36.0                   | 46.4                           | 5.1                       | 4.07 | 89.0                              |
|                          | Uterus (incl. CIS)           | C53-C55 D06     | 18 364           | 28.4        | 19.3                   | 24.7                           | 7.8                       | 3.57 | 86.3                              |
|                          | Uterus (only invasive)       | C53-C55         | 13 450           | 20.8        | 12.8                   | 16.6                           | 10.2                      | 2.62 | 83.0                              |
|                          | Cervix uteri                 | C53             | 6488             | 10.0        | 6.6                    | 8.5                            | 7.5                       | 2.87 | 85.4                              |
|                          | Corpus uteri                 | C54             | 5715             | 8.8         | 5.4                    | 6.9                            | 5.3                       | 5.04 | 89.4                              |
|                          | Ovary                        | C56             | 7314             | 11.3        | 7.0                    | 8.9                            | 17.3                      | 1.79 | 73.5                              |
|                          | Kidney                       | C64-C66 C68     | 3452             | 5.3         | 2.5                    | 3.4                            | 17.4                      | 2.10 | 67.0                              |
| Bladder                  | C67                          | 3638            | 5.6              | 2.2         | 3.2                    | 16.1                           | 2.45                      | 77.3 |                                   |
| Brain and nervous system | C70-C72                      | 1946            | 3.0              | 2.0         | 2.3                    | 26.1                           | 2.90                      | 65.9 |                                   |
| Thyroid                  | C73                          | 6464            | 10.0             | 6.6         | 8.3                    | 4.1                            | 7.25                      | 89.8 |                                   |
| Malignant lymphoma       | C81-C85 C96                  | 5312            | 8.2              | 4.2         | 5.6                    | 18.0                           | 1.68                      | 78.8 |                                   |
| Multiple myeloma         | C88-C90                      | 1843            | 2.8              | 1.1         | 1.7                    | 33.0                           | 1.13                      | 64.4 |                                   |
| Hematopoietic tissue     | C91-C95                      | 3338            | 5.2              | 3.5         | 4.0                    | 26.8                           | 1.19                      | 70.9 |                                   |

\*Per 100 000 population.

ICD-10th, International Classification of Diseases, 10th Revision; DCO/I, proportion of cases with the death certificate only; I/D, number of incidence/number of deaths; HV/I, proportion of histologically verified cases to incident cases.

**Table 2.** Age-specific incidence in Japan according to sex and primary site, 1999

| Sex                      | Primary sites                | ICD-10th        | All ages | Age group (years) |     |       |       |       |       |       |       |       |        |        |        |        |        |        |        |        |        |
|--------------------------|------------------------------|-----------------|----------|-------------------|-----|-------|-------|-------|-------|-------|-------|-------|--------|--------|--------|--------|--------|--------|--------|--------|--------|
|                          |                              |                 |          | 0-4               | 5-9 | 10-14 | 15-19 | 20-24 | 25-29 | 30-34 | 35-39 | 40-44 | 45-49  | 50-54  | 55-59  | 60-64  | 65-69  | 70-74  | 75-79  | 80-84  | 85+    |
| Male                     | All sites                    | C00-C96         | 304 527  | 492               | 267 | 286   | 497   | 658   | 1008  | 1361  | 2319  | 4484  | 10556  | 18147  | 28418  | 37290  | 53519  | 58757  | 39143  | 26768  | 20557  |
|                          | Lip, oral cavity and pharynx | C00-C14         | 6563     | 0                 | 0   | 6     | 16    | 39    | 65    | 64    | 86    | 134   | 388    | 558    | 875    | 978    | 1111   | 1037   | 583    | 340    | 283    |
|                          | Esophagus                    | C15             | 12 402   | 0                 | 0   | 0     | 0     | 2     | 0     | 6     | 15    | 122   | 353    | 903    | 1791   | 1962   | 2376   | 2248   | 1299   | 800    | 525    |
|                          | Stomach                      | C16             | 69 627   | 0                 | 0   | 0     | 5     | 33    | 113   | 190   | 545   | 1188  | 2906   | 4610   | 7096   | 9169   | 12303  | 13268  | 8391   | 5595   | 4215   |
|                          | Colon                        | C18             | 35 092   | 0                 | 0   | 0     | 7     | 16    | 60    | 125   | 235   | 575   | 1275   | 2336   | 3627   | 4849   | 6482   | 6521   | 4310   | 2632   | 2042   |
|                          | Rectum                       | C19-C21         | 20 461   | 0                 | 0   | 0     | 7     | 8     | 24    | 82    | 195   | 390   | 1006   | 1678   | 2705   | 3054   | 3662   | 3652   | 1898   | 1229   | 871    |
|                          | Liver                        | C22             | 26 174   | 29                | 13  | 0     | 1     | 14    | 16    | 33    | 91    | 237   | 951    | 1696   | 2705   | 3990   | 6166   | 4768   | 2767   | 1605   | 1092   |
|                          | Gallbladder                  | C23-C24         | 8024     | 0                 | 2   | 0     | 0     | 0     | 6     | 11    | 41    | 62    | 133    | 333    | 503    | 859    | 1217   | 1571   | 1244   | 1054   | 988    |
|                          | Pancreas                     | C25             | 10 490   | 3                 | 0   | 5     | 3     | 0     | 13    | 7     | 34    | 103   | 349    | 640    | 1015   | 1106   | 1711   | 2085   | 1465   | 1125   | 826    |
|                          | Larynx                       | C32             | 3196     | 0                 | 0   | 0     | 0     | 0     | 2     | 0     | 9     | 34    | 84     | 248    | 403    | 497    | 586    | 621    | 328    | 240    | 144    |
|                          | Lung                         | C33-C34         | 45 091   | 0                 | 0   | 0     | 3     | 8     | 14    | 60    | 158   | 417   | 923    | 1829   | 2998   | 4360   | 7711   | 10261  | 7570   | 5131   | 3648   |
|                          | Skin                         | C43-C44         | 3834     | 3                 | 5   | 5     | 7     | 9     | 22    | 47    | 35    | 77    | 141    | 159    | 284    | 396    | 540    | 643    | 541    | 456    | 464    |
|                          | Prostate                     | C61             | 17 865   | 0                 | 0   | 0     | 3     | 0     | 0     | 3     | 0     | 5     | 23     | 159    | 576    | 1401   | 2964   | 4363   | 3356   | 2742   | 2270   |
|                          | Kidney                       | C64-C66 C68     | 6872     | 29                | 0   | 11    | 0     | 13    | 18    | 50    | 88    | 171   | 357    | 606    | 680    | 902    | 1127   | 1242   | 771    | 465    | 342    |
|                          | Bladder                      | C67             | 11 418   | 5                 | 0   | 0     | 0     | 0     | 22    | 42    | 81    | 101   | 301    | 625    | 874    | 1133   | 1944   | 2317   | 1731   | 1224   | 1018   |
|                          | Brain and nervous system     | C70-C72         | 2222     | 55                | 44  | 44    | 47    | 34    | 103   | 66    | 107   | 96    | 145    | 177    | 222    | 191    | 270    | 239    | 159    | 134    | 89     |
|                          | Thyroid                      | C73             | 1520     | 0                 | 1   | 8     | 15    | 26    | 45    | 38    | 56    | 86    | 132    | 145    | 153    | 184    | 202    | 204    | 121    | 62     | 42     |
|                          | Malignant lymphoma           | C81-C85 C96     | 7121     | 29                | 29  | 39    | 110   | 90    | 89    | 106   | 145   | 202   | 336    | 501    | 703    | 737    | 1122   | 1210   | 741    | 514    | 418    |
|                          | Multiple myeloma             | C88-C90         | 1812     | 0                 | 0   | 0     | 0     | 0     | 2     | 2     | 11    | 18    | 42     | 103    | 135    | 193    | 259    | 373    | 293    | 193    | 188    |
|                          | Hematopoietic tissue         | C91-C95         | 4499     | 141               | 98  | 78    | 123   | 137   | 93    | 107   | 90    | 115   | 299    | 281    | 343    | 447    | 596    | 600    | 421    | 251    | 279    |
| Female                   | All sites (incl. CIS)        | C00-C96 D05-D06 | 224 996  | 330               | 181 | 201   | 343   | 732   | 1663  | 3390  | 5407  | 8188  | 15 050 | 16 634 | 19 761 | 22 315 | 26 846 | 29 250 | 27 695 | 22 004 | 25 006 |
|                          | All sites                    | C00-C96         | 219 163  | 330               | 181 | 201   | 339   | 658   | 1332  | 2460  | 4493  | 7362  | 14 072 | 16 128 | 19 417 | 22 001 | 26 623 | 29 033 | 27 607 | 21 952 | 24 974 |
|                          | Lip, oral cavity and pharynx | C00-C14         | 2638     | 0                 | 0   | 0     | 2     | 11    | 31    | 30    | 56    | 84    | 128    | 152    | 235    | 286    | 350    | 324    | 336    | 284    | 329    |
|                          | Esophagus                    | C15             | 2428     | 0                 | 0   | 2     | 0     | 4     | 0     | 2     | 7     | 24    | 66     | 158    | 197    | 274    | 293    | 347    | 349    | 292    | 413    |
|                          | Stomach                      | C16             | 34 058   | 0                 | 0   | 3     | 18    | 52    | 103   | 213   | 481   | 924   | 1604   | 1924   | 2457   | 3275   | 4238   | 5064   | 5137   | 4007   | 4558   |
|                          | Colon                        | C18             | 27 105   | 0                 | 0   | 3     | 9     | 11    | 30    | 100   | 183   | 348   | 948    | 1469   | 2415   | 2938   | 3780   | 4416   | 3974   | 3059   | 3422   |
|                          | Rectum                       | C19-C21         | 11 834   | 0                 | 0   | 0     | 3     | 7     | 28    | 50    | 113   | 236   | 592    | 866    | 1321   | 1489   | 1597   | 1655   | 1543   | 1180   | 1154   |
|                          | Liver                        | C22             | 11 794   | 14                | 3   | 0     | 2     | 5     | 16    | 15    | 22    | 74    | 156    | 281    | 590    | 1249   | 2097   | 2317   | 1954   | 1541   | 1458   |
|                          | Gallbladder                  | C23-C24         | 9027     | 0                 | 0   | 0     | 3     | 0     | 0     | 3     | 21    | 45    | 124    | 203    | 422    | 664    | 965    | 1308   | 1679   | 1567   | 2023   |
|                          | Pancreas                     | C25             | 8744     | 0                 | 0   | 1     | 0     | 2     | 7     | 16    | 20    | 82    | 151    | 311    | 604    | 716    | 1054   | 1220   | 1576   | 1281   | 1703   |
|                          | Larynx                       | C32             | 224      | 0                 | 0   | 0     | 0     | 0     | 0     | 0     | 0     | 1     | 5      | 12     | 38     | 25     | 29     | 31     | 40     | 22     | 21     |
|                          | Lung                         | C33-C34         | 18 226   | 0                 | 2   | 0     | 3     | 7     | 15    | 61    | 87    | 183   | 570    | 919    | 1463   | 1695   | 2351   | 2853   | 2927   | 2407   | 2683   |
|                          | Skin                         | C43-C44         | 3490     | 2                 | 0   | 5     | 3     | 21    | 25    | 33    | 51    | 69    | 109    | 147    | 187    | 257    | 333    | 369    | 522    | 518    | 839    |
|                          | Breast                       | C50 D05         | 36 139   | 3                 | 0   | 4     | 5     | 22    | 209   | 733   | 1735  | 3147  | 6070   | 5008   | 4467   | 3967   | 3454   | 3021   | 1987   | 1216   | 1091   |
|                          | Uterus (incl. CIS)           | C53-C55 D06     | 18 364   | 0                 | 0   | 0     | 7     | 98    | 553   | 1512  | 1724  | 1624  | 2169   | 2103   | 1756   | 1597   | 1502   | 1293   | 915    | 690    | 821    |
|                          | Uterus (only invasive)       | C53-C55         | 13 450   | 0                 | 0   | 0     | 2     | 22    | 212   | 566   | 823   | 884   | 1405   | 1740   | 1506   | 1421   | 1350   | 1171   | 878    | 665    | 805    |
|                          | Cervix uteri                 | C53             | 6488     | 0                 | 0   | 0     | 0     | 10    | 146   | 449   | 591   | 594   | 742    | 675    | 548    | 564    | 528    | 555    | 436    | 316    | 334    |
|                          | Corpus uteri                 | C54             | 5715     | 0                 | 0   | 0     | 2     | 5     | 50    | 74    | 164   | 227   | 599    | 999    | 895    | 807    | 766    | 522    | 322    | 164    | 119    |
|                          | Ovary                        | C56             | 7314     | 1                 | 3   | 15    | 72    | 112   | 218   | 160   | 215   | 413   | 777    | 978    | 948    | 758    | 775    | 585    | 447    | 421    | 416    |
|                          | Kidney                       | C64-C66 C68     | 3452     | 14                | 4   | 3     | 5     | 9     | 12    | 23    | 31    | 68    | 150    | 188    | 260    | 325    | 513    | 535    | 532    | 383    | 397    |
| Bladder                  | C67                          | 3638            | 0        | 0                 | 0   | 0     | 7     | 2     | 18    | 31    | 34    | 44    | 131    | 225    | 259    | 417    | 567    | 614    | 584    | 705    |        |
| Brain and nervous system | C70-C72                      | 1946            | 54       | 51                | 25  | 24    | 42    | 45    | 48    | 66    | 63    | 119   | 131    | 175    | 171    | 209    | 228    | 194    | 164    | 137    |        |
| Thyroid                  | C73                          | 6464            | 0        | 3                 | 9   | 32    | 113   | 171   | 254   | 348   | 476   | 704   | 779    | 793    | 755    | 689    | 536    | 375    | 243    | 184    |        |
| Malignant lymphoma       | C81-C85 C96                  | 5312            | 13       | 10                | 17  | 34    | 77    | 50    | 54    | 125   | 165   | 259   | 313    | 419    | 507    | 688    | 756    | 723    | 566    | 536    |        |
| Multiple myeloma         | C88-C90                      | 1843            | 0        | 0                 | 0   | 0     | 0     | 0     | 0     | 2     | 15    | 34    | 74     | 107    | 169    | 243    | 357    | 353    | 239    | 250    |        |
| Hematopoietic tissue     | C91-C95                      | 3338            | 97       | 64                | 62  | 73    | 55    | 79    | 84    | 75    | 109   | 147   | 220    | 261    | 339    | 353    | 430    | 385    | 225    | 280    |        |

ICD-10th, International Classification of Diseases, 10th Revision.

**Table 3.** Age-specific incidence rate per 100 000 population in Japan according to sex and primary site, 1999

| Sex                      | Primary sites                | ICD-10th        | Age group (years) |     |       |       |       |       |       |       |       |       |       |       |        |        |        |        |        |        |
|--------------------------|------------------------------|-----------------|-------------------|-----|-------|-------|-------|-------|-------|-------|-------|-------|-------|-------|--------|--------|--------|--------|--------|--------|
|                          |                              |                 | 0-4               | 5-9 | 10-14 | 15-19 | 20-24 | 25-29 | 30-34 | 35-39 | 40-44 | 45-49 | 50-54 | 55-59 | 60-64  | 65-69  | 70-74  | 75-79  | 80-84  | 85+    |
| Male                     | All sites                    | C00-C96         | 16.1              | 8.6 | 8.3   | 12.7  | 14.5  | 20.0  | 31.0  | 58.0  | 113.0 | 223.4 | 369.5 | 650.4 | 1010.6 | 1633.2 | 2283.6 | 2625.3 | 3094.6 | 3369.9 |
|                          | Lip, oral cavity and pharynx | C00-C14         | 0.0               | 0.0 | 0.2   | 0.4   | 0.9   | 1.3   | 1.5   | 2.2   | 3.4   | 8.2   | 11.4  | 20.0  | 26.5   | 33.9   | 40.3   | 39.1   | 39.3   | 46.4   |
|                          | Esophagus                    | C15             | 0.0               | 0.0 | 0.0   | 0.0   | 0.0   | 0.0   | 0.1   | 0.4   | 3.1   | 7.5   | 18.4  | 41.0  | 53.2   | 72.5   | 87.4   | 87.1   | 92.5   | 86.1   |
|                          | Stomach                      | C16             | 0.0               | 0.0 | 0.0   | 0.1   | 0.7   | 2.2   | 4.3   | 13.6  | 29.9  | 61.5  | 93.9  | 162.4 | 248.5  | 375.4  | 515.7  | 562.8  | 646.8  | 691.0  |
|                          | Colon                        | C18             | 0.0               | 0.0 | 0.0   | 0.2   | 0.4   | 1.2   | 2.8   | 5.9   | 14.5  | 27.0  | 47.6  | 83.0  | 131.4  | 197.8  | 253.4  | 289.1  | 304.3  | 334.7  |
|                          | Rectum                       | C19-C21         | 0.0               | 0.0 | 0.0   | 0.2   | 0.2   | 0.5   | 1.9   | 4.9   | 9.8   | 21.3  | 34.2  | 61.9  | 82.8   | 111.7  | 141.9  | 127.3  | 142.0  | 142.8  |
|                          | Liver                        | C22             | 1.0               | 0.4 | 0.0   | 0.0   | 0.3   | 0.3   | 0.8   | 2.3   | 6.0   | 20.1  | 34.5  | 61.9  | 108.1  | 188.2  | 185.3  | 185.6  | 185.6  | 179.0  |
|                          | Gallbladder                  | C23-C24         | 0.0               | 0.1 | 0.0   | 0.0   | 0.0   | 0.1   | 0.2   | 1.0   | 1.6   | 2.8   | 6.8   | 11.5  | 23.3   | 37.1   | 61.1   | 83.5   | 121.8  | 161.9  |
|                          | Pancreas                     | C25             | 0.1               | 0.0 | 0.2   | 0.1   | 0.0   | 0.3   | 0.1   | 0.8   | 2.6   | 7.4   | 13.0  | 23.2  | 30.0   | 52.2   | 81.0   | 98.2   | 130.0  | 135.4  |
|                          | Larynx                       | C32             | 0.0               | 0.0 | 0.0   | 0.0   | 0.0   | 0.0   | 0.0   | 0.2   | 0.9   | 1.8   | 5.1   | 9.2   | 13.5   | 17.9   | 24.2   | 22.0   | 27.7   | 23.7   |
|                          | Lung                         | C33-C34         | 0.0               | 0.0 | 0.0   | 0.1   | 0.2   | 0.3   | 1.4   | 4.0   | 10.5  | 19.5  | 37.2  | 68.6  | 118.1  | 235.3  | 398.8  | 507.7  | 593.1  | 598.0  |
|                          | Skin                         | C43-C44         | 0.1               | 0.2 | 0.1   | 0.2   | 0.2   | 0.4   | 1.1   | 0.9   | 2.0   | 3.0   | 3.2   | 6.5   | 10.7   | 16.5   | 25.0   | 36.3   | 52.8   | 76.1   |
|                          | Prostate                     | C61             | 0.0               | 0.0 | 0.0   | 0.1   | 0.0   | 0.0   | 0.1   | 0.0   | 0.1   | 0.5   | 3.2   | 13.2  | 38.0   | 90.4   | 169.6  | 225.1  | 317.0  | 372.1  |
|                          | Kidney                       | C64-C66 C68     | 1.0               | 0.0 | 0.3   | 0.0   | 0.3   | 0.4   | 1.1   | 2.2   | 4.3   | 7.6   | 12.3  | 15.6  | 24.4   | 34.4   | 48.3   | 51.7   | 53.8   | 56.1   |
|                          | Bladder                      | C67             | 0.2               | 0.0 | 0.0   | 0.0   | 0.0   | 0.4   | 1.0   | 2.0   | 2.6   | 6.4   | 12.7  | 20.0  | 30.7   | 59.3   | 90.1   | 116.1  | 141.5  | 166.8  |
|                          | Brain and nervous system     | C70-C72         | 1.8               | 1.4 | 1.3   | 1.2   | 0.8   | 2.0   | 1.5   | 2.7   | 2.4   | 3.1   | 3.6   | 5.1   | 5.2    | 8.3    | 9.3    | 10.7   | 15.4   | 14.5   |
|                          | Thyroid                      | C73             | 0.0               | 0.0 | 0.2   | 0.4   | 0.6   | 0.9   | 0.9   | 1.4   | 2.2   | 2.8   | 3.0   | 3.5   | 5.0    | 6.2    | 7.9    | 8.1    | 7.2    | 6.8    |
|                          | Malignant lymphoma           | C81-C85 C96     | 1.0               | 0.9 | 1.1   | 2.8   | 2.0   | 1.8   | 2.4   | 3.6   | 5.1   | 7.1   | 10.2  | 16.1  | 20.0   | 34.2   | 47.0   | 49.7   | 59.4   | 68.5   |
|                          | Multiple myeloma             | C88-C90         | 0.0               | 0.0 | 0.0   | 0.0   | 0.0   | 0.0   | 0.0   | 0.3   | 0.5   | 0.9   | 2.1   | 3.1   | 5.2    | 7.9    | 14.5   | 19.7   | 22.4   | 30.9   |
|                          | Hematopoietic tissue         | C91-C95         | 4.6               | 3.2 | 2.2   | 3.1   | 3.0   | 1.8   | 2.4   | 2.3   | 2.9   | 6.3   | 5.7   | 7.9   | 12.1   | 18.2   | 23.3   | 28.3   | 29.0   | 45.7   |
| Female                   | All sites (incl. CIS)        | C00-C96 D05-D06 | 11.4              | 6.2 | 6.1   | 9.2   | 16.9  | 34.2  | 79.0  | 137.9 | 208.5 | 319.0 | 336.4 | 436.3 | 566.4  | 730.7  | 924.8  | 1137.4 | 1372.7 | 1673.7 |
|                          | All sites                    | C00-C96         | 11.4              | 6.2 | 6.1   | 9.1   | 15.2  | 27.4  | 57.3  | 114.6 | 187.4 | 298.3 | 326.1 | 428.7 | 558.4  | 724.6  | 917.9  | 1133.8 | 1369.4 | 1671.6 |
|                          | Lip, oral cavity and pharynx | C00-C14         | 0.0               | 0.0 | 0.0   | 0.0   | 0.3   | 0.6   | 0.7   | 1.4   | 2.1   | 2.7   | 3.1   | 5.2   | 7.3    | 9.5    | 10.2   | 13.8   | 17.7   | 22.0   |
|                          | Esophagus                    | C15             | 0.0               | 0.0 | 0.0   | 0.0   | 0.1   | 0.0   | 0.0   | 0.2   | 0.6   | 1.4   | 3.2   | 4.3   | 6.9    | 8.0    | 11.0   | 14.4   | 18.2   | 27.6   |
|                          | Stomach                      | C16             | 0.0               | 0.0 | 0.1   | 0.5   | 1.2   | 2.1   | 5.0   | 12.3  | 23.5  | 34.0  | 38.9  | 54.3  | 83.1   | 115.3  | 160.1  | 210.9  | 249.9  | 305.1  |
|                          | Colon                        | C18             | 0.0               | 0.0 | 0.1   | 0.3   | 0.3   | 0.6   | 2.3   | 4.7   | 8.9   | 20.1  | 29.7  | 53.3  | 74.6   | 102.9  | 139.6  | 163.2  | 190.8  | 229.1  |
|                          | Rectum                       | C19-C21         | 0.0               | 0.0 | 0.0   | 0.1   | 0.2   | 0.6   | 1.2   | 2.9   | 6.0   | 12.5  | 17.5  | 29.2  | 37.8   | 43.5   | 52.3   | 63.4   | 73.6   | 77.2   |
|                          | Liver                        | C22             | 0.5               | 0.1 | 0.0   | 0.1   | 0.1   | 0.3   | 0.3   | 0.5   | 1.9   | 3.3   | 5.7   | 13.0  | 31.7   | 57.1   | 73.3   | 80.3   | 96.2   | 97.6   |
|                          | Gallbladder                  | C23-C24         | 0.0               | 0.0 | 0.0   | 0.1   | 0.0   | 0.0   | 0.1   | 0.5   | 1.1   | 2.6   | 4.1   | 9.3   | 16.9   | 26.3   | 41.3   | 69.0   | 97.8   | 135.4  |
|                          | Pancreas                     | C25             | 0.0               | 0.0 | 0.0   | 0.0   | 0.0   | 0.1   | 0.4   | 0.5   | 2.1   | 3.2   | 6.3   | 13.3  | 18.2   | 28.7   | 38.6   | 64.7   | 79.9   | 114.0  |
|                          | Larynx                       | C32             | 0.0               | 0.0 | 0.0   | 0.0   | 0.0   | 0.0   | 0.0   | 0.0   | 0.0   | 0.1   | 0.3   | 0.8   | 0.6    | 0.8    | 1.0    | 1.6    | 1.4    | 1.4    |
|                          | Lung                         | C33-C34         | 0.0               | 0.1 | 0.0   | 0.1   | 0.2   | 0.3   | 1.4   | 2.2   | 4.7   | 12.1  | 18.6  | 32.3  | 43.0   | 64.0   | 90.2   | 120.2  | 150.1  | 179.6  |
|                          | Skin                         | C43-C44         | 0.1               | 0.0 | 0.2   | 0.1   | 0.5   | 0.5   | 0.8   | 1.3   | 1.7   | 2.3   | 3.0   | 4.1   | 6.5    | 9.1    | 11.7   | 21.4   | 32.3   | 56.1   |
|                          | Breast                       | C50 D05         | 0.1               | 0.0 | 0.1   | 0.1   | 0.5   | 4.3   | 17.1  | 44.2  | 80.1  | 128.7 | 101.3 | 98.6  | 100.7  | 94.0   | 95.5   | 81.6   | 75.9   | 73.0   |
|                          | Uterus (incl. CIS)           | C53-C55 D06     | 0.0               | 0.0 | 0.0   | 0.2   | 2.3   | 11.4  | 35.2  | 44.0  | 41.3  | 46.0  | 42.5  | 38.8  | 40.5   | 40.9   | 40.9   | 37.6   | 43.1   | 55.0   |
|                          | Uterus (only invasive)       | C53-C55         | 0.0               | 0.0 | 0.0   | 0.1   | 0.5   | 4.4   | 13.2  | 21.0  | 22.5  | 29.8  | 35.2  | 33.3  | 36.1   | 36.7   | 37.0   | 36.1   | 41.5   | 53.9   |
|                          | Cervix uteri                 | C53             | 0.0               | 0.0 | 0.0   | 0.0   | 0.2   | 3.0   | 10.5  | 15.1  | 15.1  | 15.7  | 13.6  | 12.1  | 14.3   | 14.4   | 17.6   | 17.9   | 19.7   | 22.4   |
|                          | Corpus uteri                 | C54             | 0.0               | 0.0 | 0.0   | 0.0   | 0.1   | 1.0   | 1.7   | 4.2   | 5.8   | 12.7  | 20.2  | 19.8  | 20.5   | 20.8   | 16.5   | 13.2   | 10.2   | 8.0    |
|                          | Ovary                        | C56             | 0.0               | 0.1 | 0.5   | 1.9   | 2.6   | 4.5   | 3.7   | 5.5   | 10.5  | 16.5  | 19.8  | 20.9  | 19.2   | 21.1   | 18.5   | 18.4   | 26.3   | 27.9   |
|                          | Kidney                       | C64-C66 C68     | 0.5               | 0.1 | 0.1   | 0.1   | 0.2   | 0.2   | 0.5   | 0.8   | 1.7   | 3.2   | 3.8   | 5.7   | 8.3    | 14.0   | 16.9   | 21.8   | 23.9   | 26.6   |
| Bladder                  | C67                          | 0.0             | 0.0               | 0.0 | 0.0   | 0.2   | 0.0   | 0.4   | 0.8   | 0.9   | 0.9   | 2.6   | 5.0   | 6.6   | 11.4   | 17.9   | 25.2   | 36.4   | 47.2   |        |
| Brain and nervous system | C70-C72                      | 1.9             | 1.7               | 0.8 | 0.6   | 1.0   | 0.9   | 1.1   | 1.7   | 1.6   | 2.5   | 2.7   | 3.9   | 4.4   | 5.7    | 7.2    | 8.0    | 10.2   | 9.2    |        |
| Thyroid                  | C73                          | 0.0             | 0.1               | 0.3 | 0.9   | 2.6   | 3.5   | 5.9   | 8.9   | 12.1  | 14.9  | 15.7  | 17.5  | 19.2  | 18.8   | 16.9   | 15.4   | 15.1   | 12.3   |        |
| Malignant lymphoma       | C81-C85 C96                  | 0.4             | 0.3               | 0.5 | 0.9   | 1.8   | 1.0   | 1.3   | 3.2   | 4.2   | 5.5   | 6.3   | 9.3   | 12.9  | 18.7   | 23.9   | 29.7   | 35.3   | 35.9   |        |
| Multiple myeloma         | C88-C90                      | 0.0             | 0.0               | 0.0 | 0.0   | 0.0   | 0.0   | 0.0   | 0.0   | 0.4   | 0.7   | 1.5   | 2.4   | 4.3   | 6.6    | 11.3   | 14.5   | 14.9   | 16.7   |        |
| Hematopoietic tissue     | C91-C95                      | 3.4             | 2.2               | 1.9 | 1.9   | 1.3   | 1.6   | 2.0   | 1.9   | 2.8   | 3.1   | 4.5   | 5.8   | 8.6   | 9.6    | 13.6   | 15.8   | 14.1   | 18.7   |        |

ICD-10th, International Classification of Diseases, 10th Revision.
